# Supplementary material for: PTEN-AKT2 Regulates Mixed Lineage Liver Cancer Development and Sensitizes Cancer Cells to TGFβ Treatment
Source: Research Square preprint supplement (doi:10.21203/rs.3.rs-8697220/v1), 2026-01-30
Supplement: Supplementary file 1 [file 9ef1c2eacc373b2592a00186.pdf]

## **Supplementary Methods**

### **siRNA and Plasmid Transfection**

Silencer® Select siRNA targeting SOX9 (Thermo Fisher Scientific, Waltham, MA, USA, AM16708) and a non-targeting control siRNA (Thermo Fisher Scientific, AM4611) were transfected using Lipofectamine RNAiMAX (Thermo Fisher Scientific, #13778075) according to the manufacturer's instructions. shSOX9 plasmid (VectorBuilder, VB900123-7988yz), NICD1 expression plasmid (Addgene, #20183), and corresponding empty vector controls were introduced using Lipofectamine 3000 (Thermo Fisher Scientific, #L3000008) following the manufacturer's protocol.

**Antibody used for immunoblotting and immunohistochemistry.**

| <b>Antibody</b>         | <b>Catalog #</b> | <b>Vendor</b>             | <b>Research Resource Identifiers</b> |
|-------------------------|------------------|---------------------------|--------------------------------------|
| activated Notch1        | ab8925           | Abcam                     | RRID: AB_306863                      |
| AKT1                    | 2938             | Cell Signaling Technology | RRID: AB_915788                      |
| AKT2                    | 3063             | Cell Signaling Technology | RRID: AB_2225186                     |
| Beta actin              | A5441            | Sigma                     | RRID: AB_476744                      |
| Beta actin              | 66009-1-Ig       | Proteintech               | RRID: AB_2687938                     |
| EPCAM                   | 21050-1-AP       | Proteintech               | RRID: AB_10693684                    |
| GAPDH                   | G9545            | Sigma                     | RRID: AB_796208                      |
| HepPar 1                | M7158            | Dako                      | RRID: AB_3720362                     |
| Hes1                    | 11988            | Cell Signaling Technology | RRID: AB_2728766                     |
| HNF-4-alpha             | ab41898          | Abcam                     | RRID: AB_732976                      |
| Jagged1                 | sc-390177        | Santa Cruz Biotechnology  | RRID: AB_2892141                     |
| pan-AKT1/2/3            | sc-8312          | Santa Cruz Biotechnology  | RRID: AB_671714                      |
| Pan-CK                  | Z0622            | Dako                      | RRID: AB_2650434                     |
| phospho-AKT (Ser473)    | 4060             | Cell Signaling Technology | RRID: AB_231504                      |
| phospho-AKT (Thr308)    | 9275             | Cell Signaling Technology | RRID: AB_329828                      |
| phospho-PRAS40 (Thr246) | 2640             | Cell Signaling Technology | RRID: AB_916141                      |
| Pten                    | 9559             | Cell Signaling Technology | RRID: AB_2253290                     |
| SOX9                    | AMAB90795        | Sigma                     | RRID: AB_2665670                     |
| SOX9                    | 82630            | Cell Signaling Technology | RRID: AB_2665492                     |
| Vinculin                | 26520-1-AP       | Proteintech               | RRID: AB_2868558                     |
| YFP                     | ab6673           | Abcam                     | RRID: AB_305643                      |

**Primers used for quantitative PCR.**

| <b>Primers</b> | <b>Sequence 5'-3'</b>   |
|----------------|-------------------------|
| Human SOX9 F   | CCAGAACAAGCCGCACGTCA    |
| Human SOX9 R   | CTGCCCCGTTCTTCACCGACT   |
| Human EpCAM F  | GCGAGTGAGAACCTACTGGA    |
| Human EpCAM R  | CGCGTTGTGATCTCCTTCTG    |
| Human CD133 F  | AAGGCATATGAATCCAAAATTGA |
| Human CD133 R  | CCACCAGAGGCATCAGAATAA   |
| Human GapDH F  | AGGGCTGCTTTTAACTCTGGT   |
| Human GapDH R  | CCCCACTTGATTTTGGAGGGA   |
| Mouse SOX9 F   | GTGCAAGCTGGCAAAGTTGA    |
| Mouse SOX9 R   | TGCTCAGTTCACCGATGTCC    |
| Mouse Hes1 F   | ACACCGGACAAACCAAAGAC    |
| Mouse Hes1 R   | AATGCCGGGAGCTATCTTTC    |
| Mouse Notch1 F | TGTGGCTTCCTTCTACTGCG    |
| Mouse Notch1 R | CTTTGCCGTTGACAGGGTTG    |
| Mouse 18S F    | CGGCTACCACATCCAAGGAA    |
| Mouse 18S R    | GCTGGAATTACCGCGGCT      |

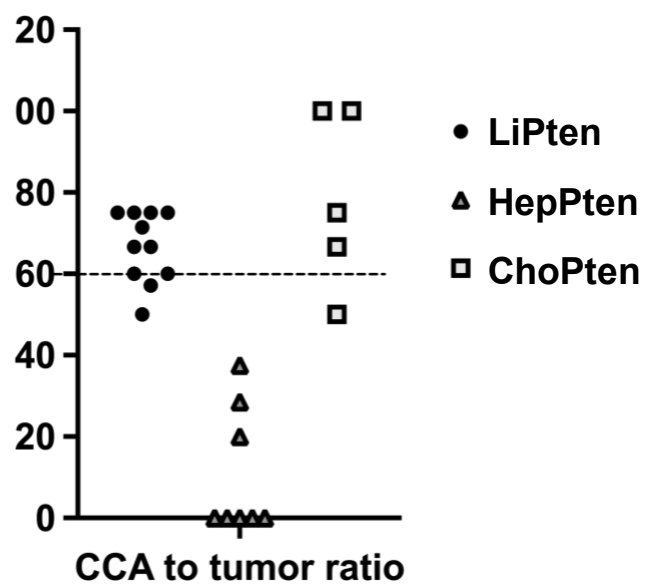

**Supplemental Figure 1. Quantification of CCA development in mouse models lacking *Pten* in the liver.** Percentage of the tumors that are CCA vs. total tumors developed in each mouse. Each dot is a mouse.

**A.**

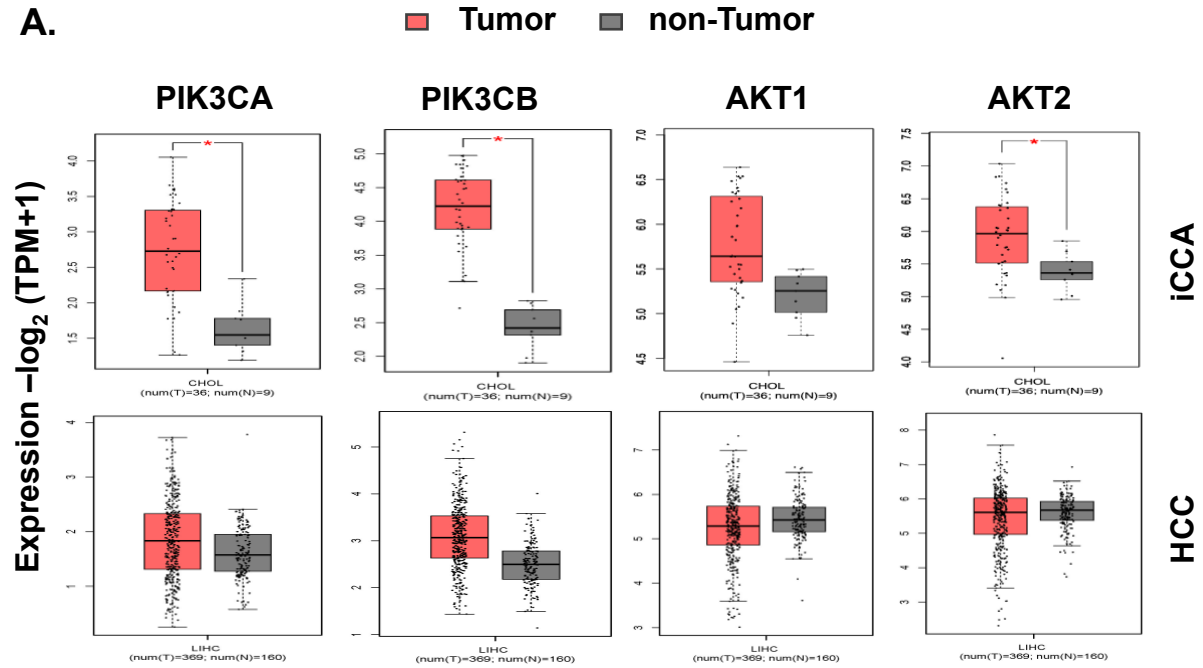

**B.**

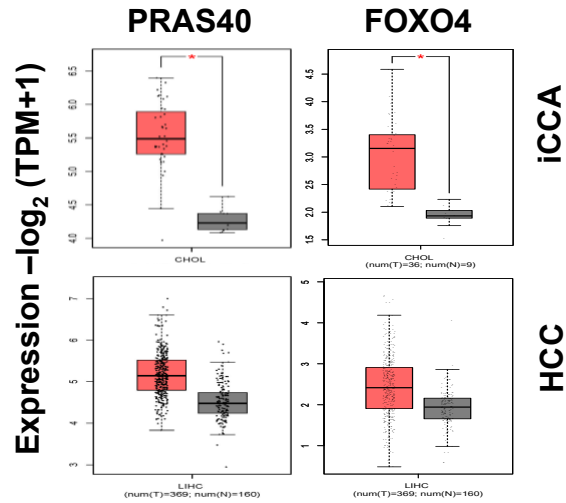

**C.**

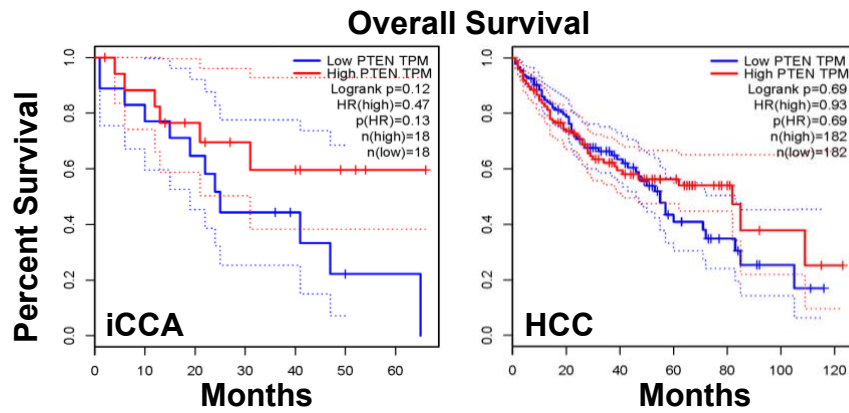

**Supplemental Figure 2. PI3K/AKT signaling pathway is correlated with CCA but not**

**HCC. (A)** PI3K isoforms; and **(B)** AKT isoforms and their targets mRNA expressions are elevated in tumor vs. non-tumor samples in CCA but not HCC. **(C)** Overall survival analysis of PTEN expression in iCCA (n=36) and HCC samples (n=364) available from TCGA analyzed using GEPIA. \* $p \leq 0.05$ .

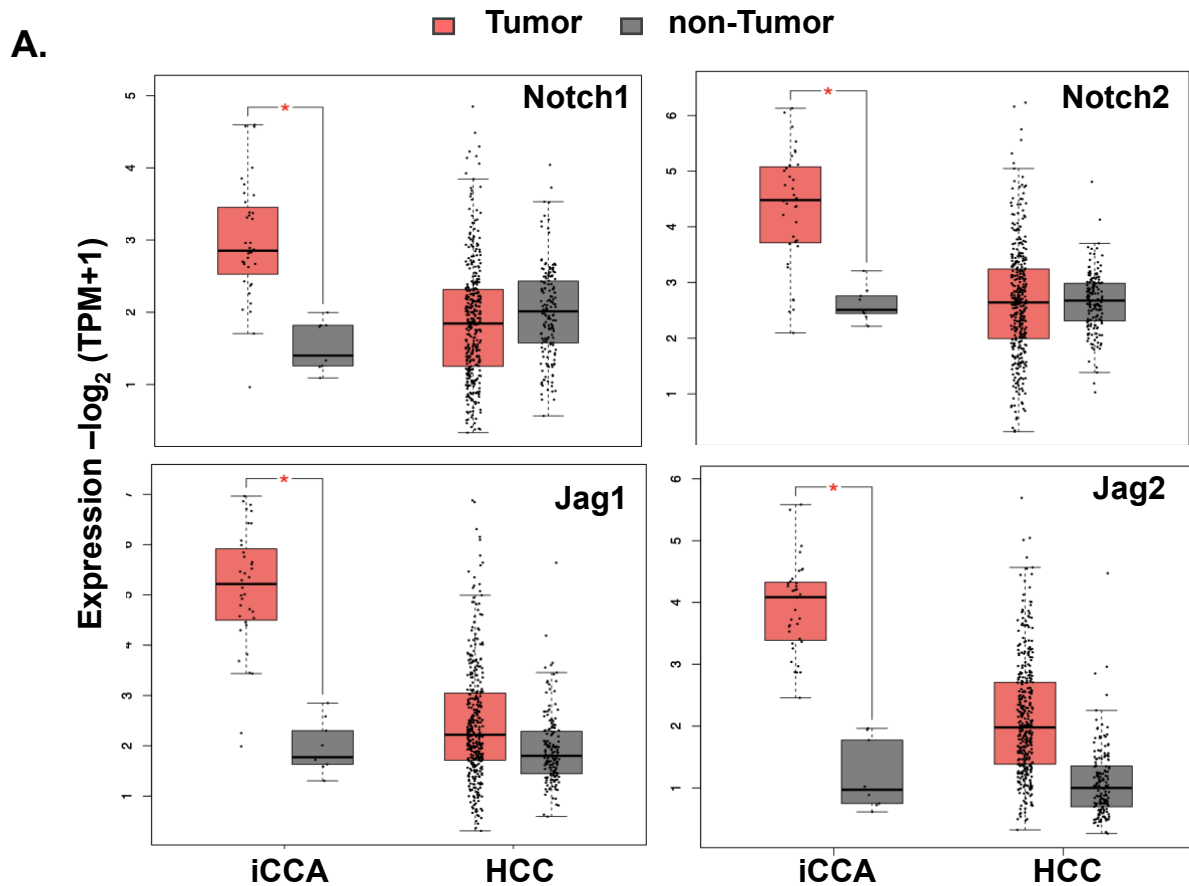

**B.**

| Expression Correlation (R) * |      |      |      |        |        |
|------------------------------|------|------|------|--------|--------|
|                              | AKT1 | AKT2 | AKT3 | PIK3CA | PIK3CB |
| Notch1                       | 0.54 | 0.39 | 0.46 | 0.57   | 0.49   |
| Notch2                       | 0.42 | 0.45 | 0.7  | 0.68   | 0.71   |
| Notch3                       | 0.35 | 0.33 | 0.51 | 0.55   | 0.48   |
| Notch4                       | 0.21 | 0.11 | 0.27 | 0.2    | 0.13   |
| Jag1                         | 0.29 | 0.32 | 0.65 | 0.53   | 0.45   |
| Jag2                         | 0.33 | 0.29 | 0.53 | 0.44   | 0.51   |
| Hes1                         | 0.35 | 0.2  | 0.38 | 0.42   | 0.41   |

**Supplemental Figure 3. Notch signaling is upregulated in CCA but not HCC and correlates well with PI3K/AKT signaling. (A)** Expression of Notch1 and 2 and Notch ligand Jag1&2 mRNA in patient liver tumor and normal samples using GEPIA **(B)** Correlation analysis of Notch signal with that of PI3K/AKT. \*P<0.0001 except Notch4-akt2 p=0.03, notch4-pik3ca p=0.01.

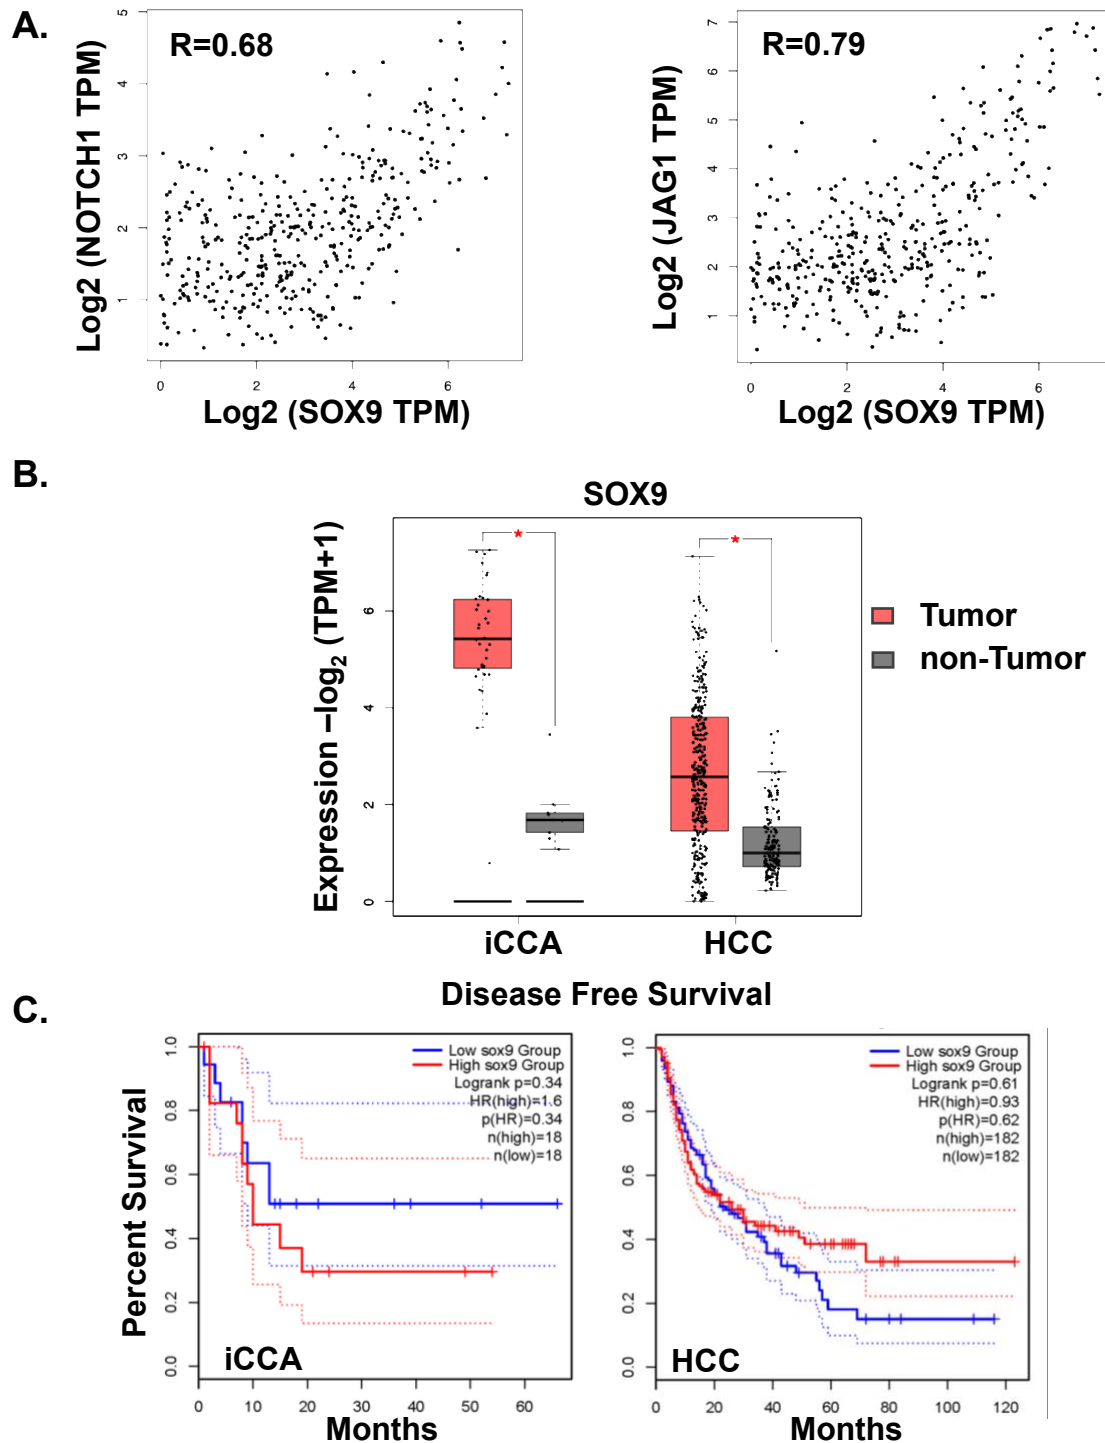



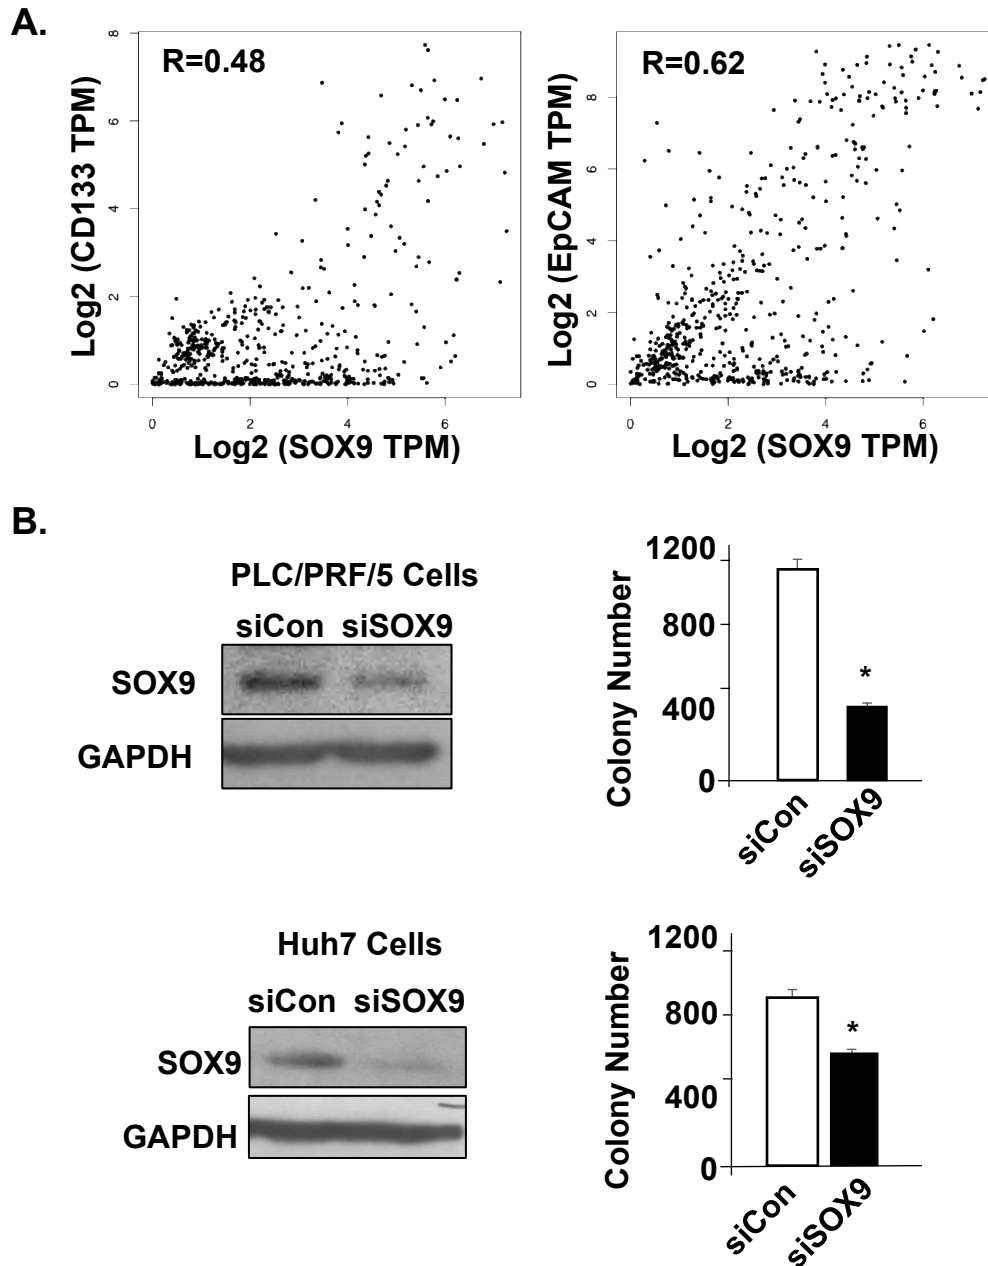

**Supplemental Fig 5. Correlation of SOX9 with stem cell markers and effects of its downregulation on colony formation. (A)** Expression of SOX9 correlates with that of CD133 and EpCAM in TCGA liver cancer samples.  $p < 0.01$ . **(B)** Colony formation in PLC/PRF/5 cells and Huh7 cells with or without siSOX9 transfection.  $*p \leq 0.05$ .  $n=3$ .

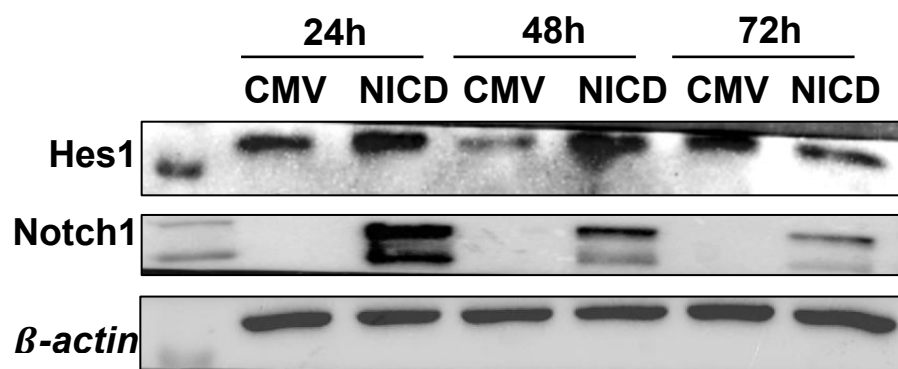

**Supplemental Fig 6. NICD introduction can activate the Notch signaling.** Immunoblotting shows NICD transfection significantly induce Notch signaling expression.

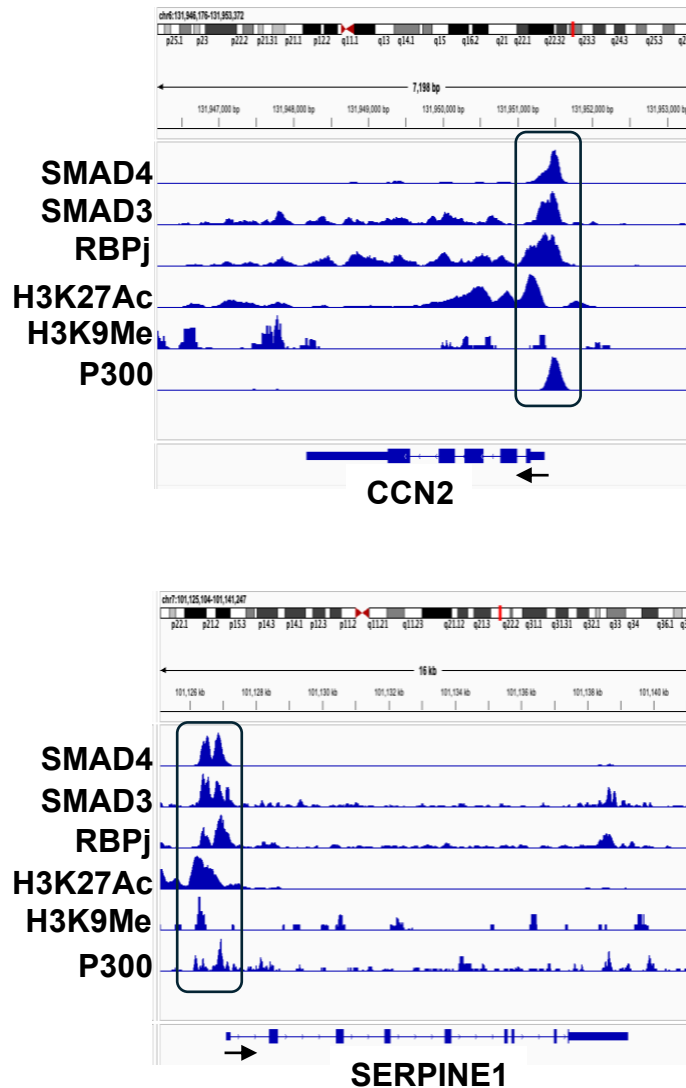

**Supplemental Fig 7. Promoter analysis of canonical TGF $\beta$  target genes.** Encode Chip-Seq data collected in HepG2 cells analyzed for promoters of CCN2 and SERPINE1, two canonical TGF $\beta$  target genes, showing SMAD3 and SMAD4 co-occupy the same active regulatory regions with RBPj. These peaks are also localized at the valley of H3K27Ac peaks, marking a transcriptional activation site.
